# Supplementary material for: Metallic 1T MoS2 nanosheet arrays vertically grown on activated carbon fiber cloth for enhanced Li-ion storage performance
Source: Royal Society of Chemistry journal article supplement (doi:10.1039/c7ta03497k), 2017-01-01
Supplement: c7ta03497k1.pdf [file c7ta03497k1.pdf]

## Supporting Information

### **Metallic 1T MoS<sub>2</sub> Nanosheet Arrays Vertically Grown on Activated Carbon Fiber Cloth for Enhanced Li-Ion Storage Performance**

Minghong Wu,<sup>a</sup> Jing Zhan,<sup>a</sup> Kuan Wu,<sup>a</sup> Zhen Li,<sup>a</sup> Liang Wang,<sup>c</sup> Bijang Geng,<sup>b</sup> Lijun Wang,<sup>b</sup> and Dengyu Pan<sup>\*,b</sup>

<sup>a</sup>Shanghai Applied Radiation Institute, School of Environmental and Chemical Engineering, Shanghai University, Shanghai 200444, PR China

<sup>b</sup>Department of Chemical Engineering, School of Environmental and Chemical Engineering, Shanghai University, Shanghai 200444, PR China

<sup>c</sup>Institute of Nanochemistry and Nanobiology, Shanghai University, Shanghai 200444, PR China

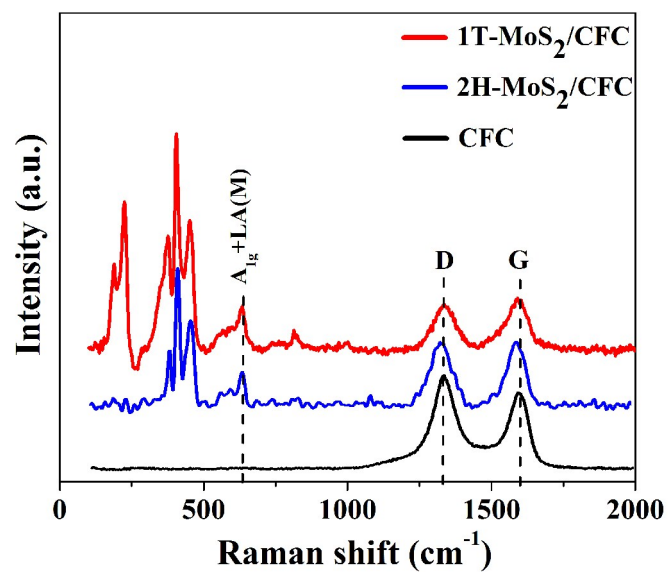

Figure S1. Raman spectra of CFC, 1T-MoS<sub>2</sub>/CFC and 2H-MoS<sub>2</sub>/CFC.

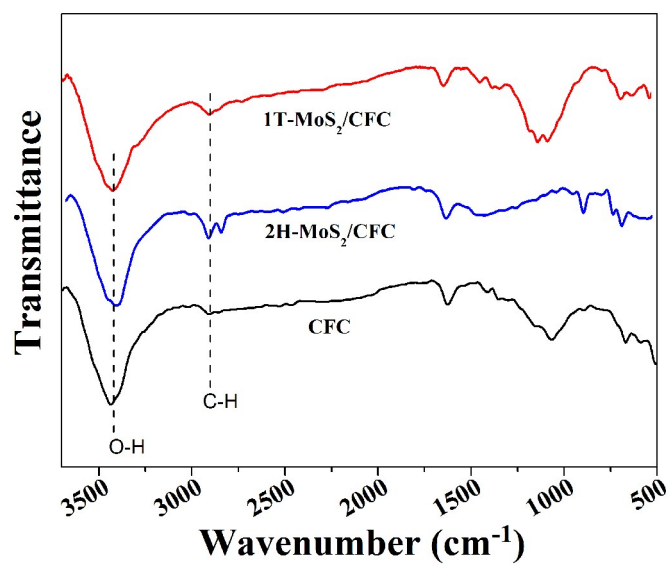

Figure S2. FT-IR spectrum of CFC, 2H-MoS<sub>2</sub>/CFC and 1T-MoS<sub>2</sub>/CFC.

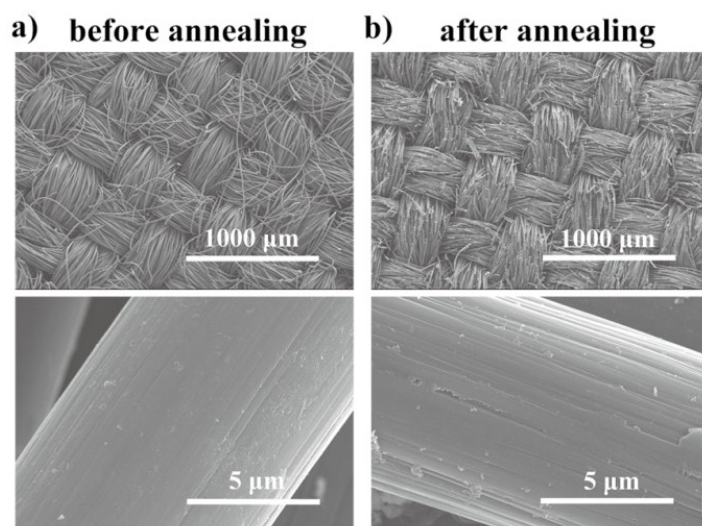

**Figure S3. SEM images of the original CFC (a-b) before and (c-d) after annealing at 450 °C in air.**

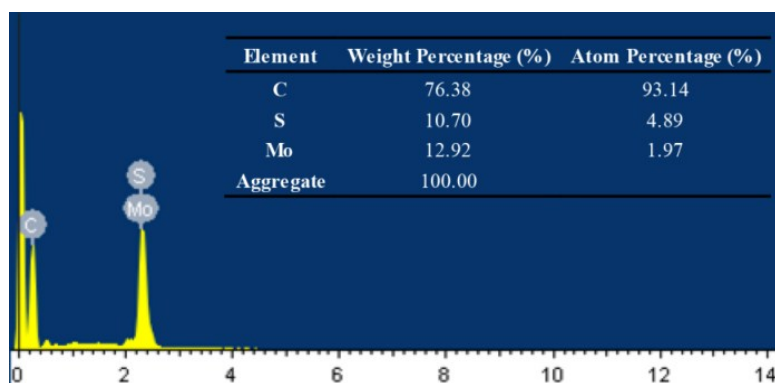

**Figure S4. EDX spectrum of MoS<sub>2</sub>/ACF**

**Table S1. Comparison of MoS<sub>2</sub> based anode materials**

| Active material                   | Phase of MoS <sub>2</sub> | Current density (mA/g) | Reversible capacity (mAh/g) | CE (%) | Reference |
|-----------------------------------|---------------------------|------------------------|-----------------------------|--------|-----------|
| 1T-MoS <sub>2</sub> /CFC          | 1T                        | 100                    | 1789                        | 81     | Our work  |
| 2H-MoS <sub>2</sub> /CFC          | 2H                        | 100                    | 1026                        | 83     | Our work  |
| 2H /1T-MoS <sub>2</sub> /Graphene | 2H/1T                     | 2000                   | 715                         | --     | 1         |
| MoS <sub>2</sub> /CNT             | 2H                        | 100                    | 1726                        | 91     | 2         |
| MoS <sub>2</sub> /RGO/o-MWCNT     | 2H                        | 100                    | 1275                        | 75     | 3         |
| MoS <sub>2</sub> +MoC/MWCNT       | 2H                        | 100                    | 963                         | --     | 4         |
| MoS <sub>2</sub> /Cnanosheet      | 2H                        | 100                    | 1191                        | 76     | 5         |

|                                     |    |      |      |    |    |
|-------------------------------------|----|------|------|----|----|
| C@MoS <sub>2</sub> nanoboxes        | 2H | 100  | 1164 | 59 | 6  |
| MoS <sub>2</sub> /PNFs              | 2H | 100  | 1210 | -- | 7  |
| PVP-C@MoS <sub>2</sub>              | 2H | 100  | 1136 | -- | 8  |
| Mesoporous-Carbon/MoS <sub>2</sub>  | 2H | 100  | 1750 | 64 | 9  |
| MoS <sub>2</sub> @N-CF              | 2H | 1000 | 839  | 85 | 10 |
| MoS <sub>2</sub> /RGO/CFC           | 2H | 200  | 1225 | -- | 11 |
| MoS <sub>2</sub> / Carbon nanofiber | 2H | 100  | 1267 | 74 | 12 |
| MoS <sub>2</sub> /CFC               | 2H | 100  | 1125 | 81 | 13 |
| C@MoS <sub>2</sub> nanoboxes        | 2H | 100  | 1164 | 59 | 14 |

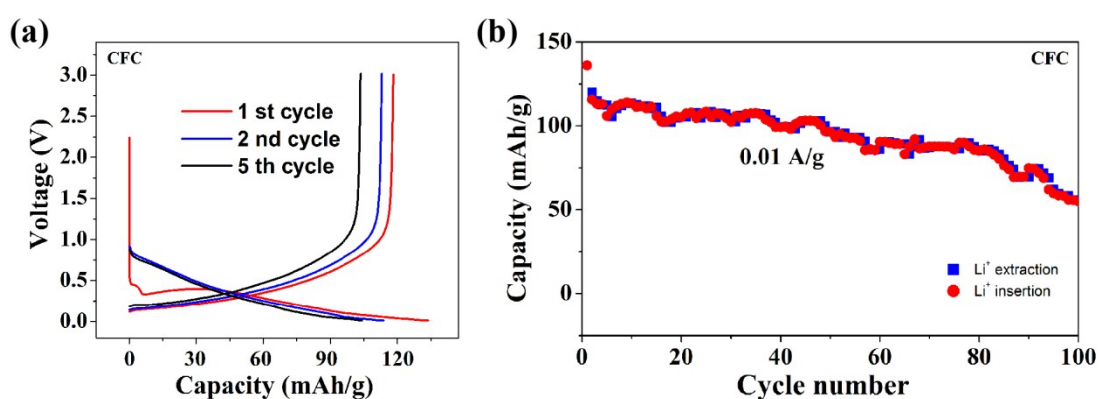

Figure S5. (a) Galvanostatic charge-discharge profiles of CFC at current densities of 0.01 A/g. (b) Cycling performance of CFC at current densities of 0.01 A/g (the weight of CFC is 18.85 mg; the reversible capacity is 117 mAh/g in the first cycle)

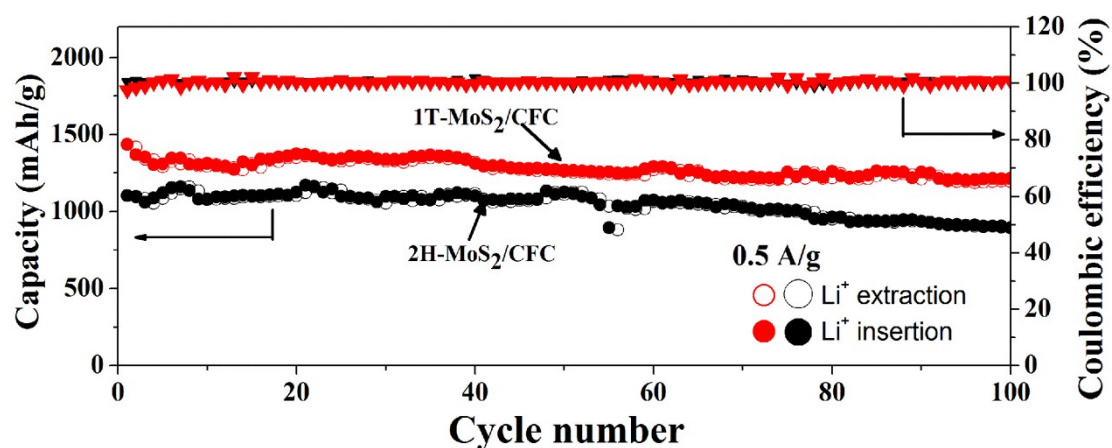

Figure S6. Cycling performance of 1T-MoS<sub>2</sub>/CFC and 2H-MoS<sub>2</sub>/CFC at current density of 0.5 A/g for 100 cycles.

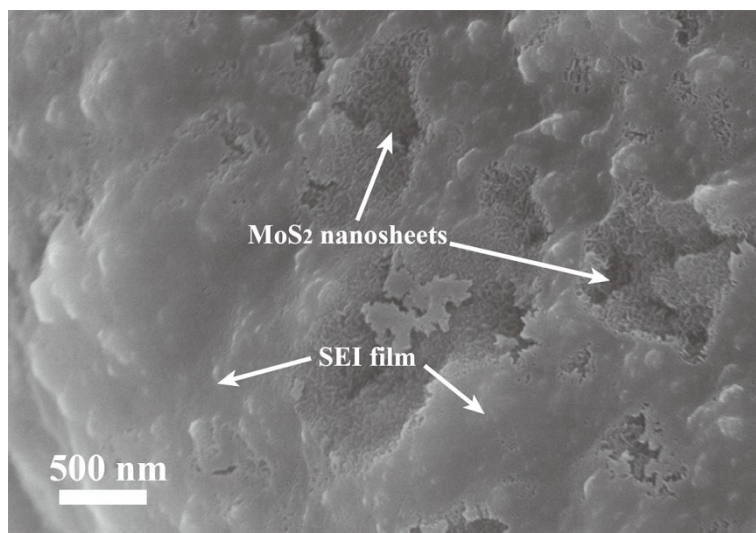

**Figure S7.** SEM images of 1T-MoS<sub>2</sub>/CFC electrodes recharged to 3.00 V after 100 cycles at current densities of 0.5 A/g.

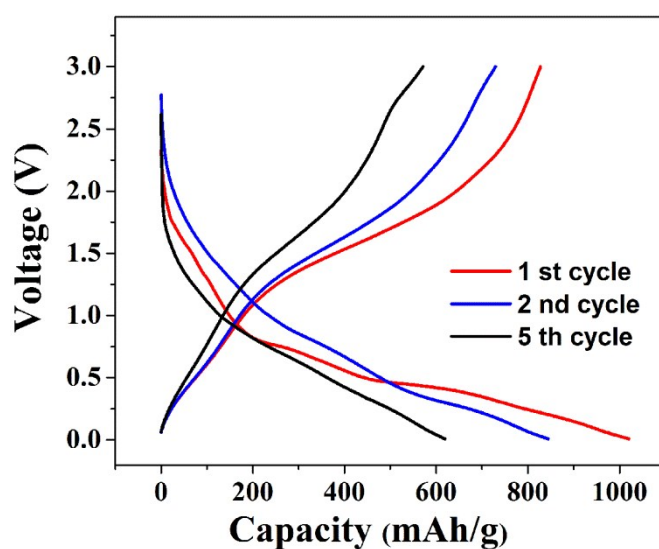

**Figure S8.** Galvanostatic charge-discharge profiles of 1T-MoS<sub>2</sub> nanosheet powder at current densities of 0.1 A/g.

For contrast, the 1T-MoS<sub>2</sub> nanosheet powder electrode was prepared by collecting the precipitate (1T-MoS<sub>2</sub> nanosheet powder) after completing the same reaction without CFC, mixing 10 wt % of acetylene black as conducting agent and 10 wt % of polyvinylidene fluoride as binder to form a homogeneous slurry, and then spreading

uniformly onto a copper foil with the mass loading of about  $1.3 \pm 0.2$  mg/cm<sup>2</sup>.

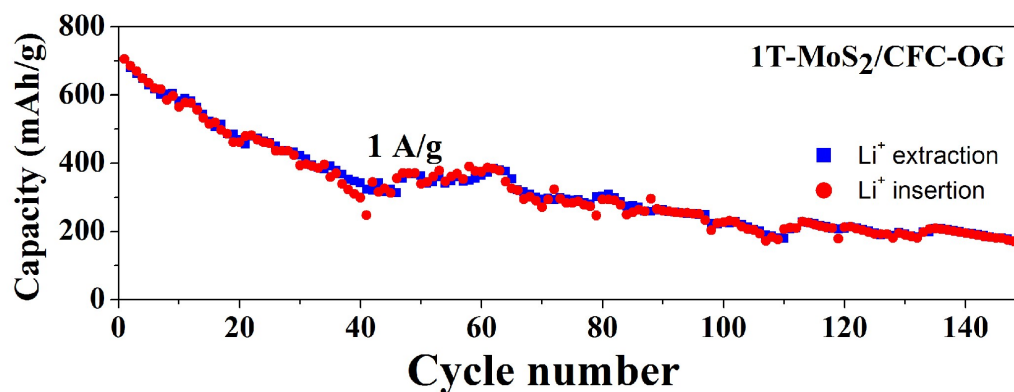

Figure S9. Cycling performance of the MoS<sub>2</sub>/CFC grown under DMF:H<sub>2</sub>O = 0.5:1.0 vol/vol at current density of 1 A/g.

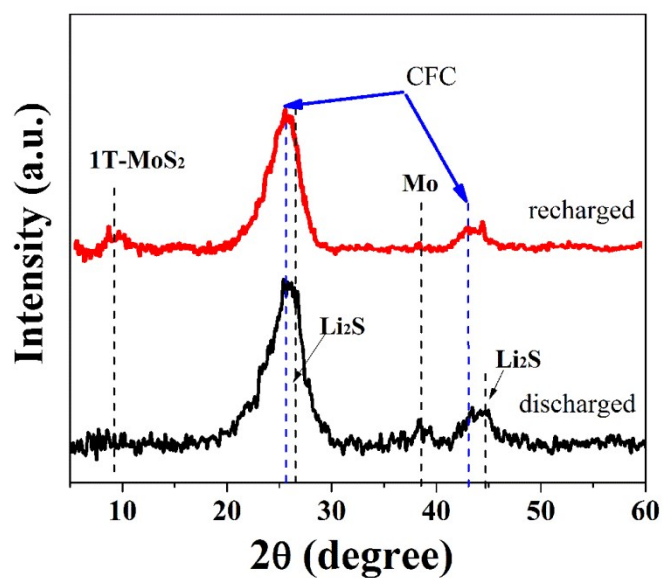

Figure S10. XRD patterns of 1T-MoS<sub>2</sub>/CFC discharged to 0.01 V and then recharged to 3.00 V after 10 cycles at current density of 1 A/g.

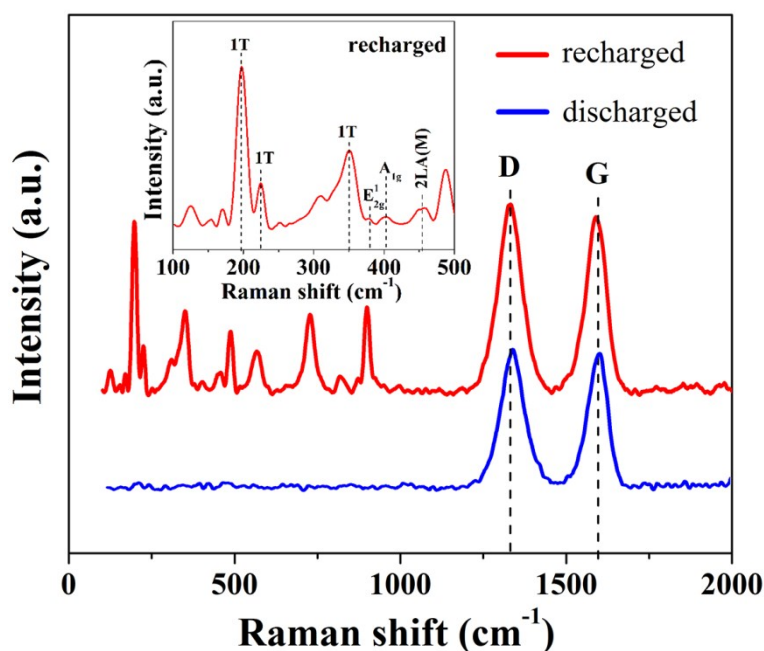

**Figure S11.** Raman patterns of 1T-MoS<sub>2</sub>/CFC discharged to 0.01 V and then recharged to 3.00 V after 10 cycles at current density of 1 A/g.

## Reference

1. Y. Zhou, Y. Liu, W. X. Zhao, R. M. Xu, D. H. Wang, B. J. Li, X. Zhou and H. Shen, *Electrochim. Acta*, 2016, **211**, 1048-1055.
2. J. Y. Li, Y. Hou, X. F. Gao, D. S. Guan, Y. Y. Xie, J. H. Chen and C. Yuan, *Nano Energy*, 2015, **16**, 10-18.
3. N. Lingappan, N. H. Van, S. Lee and D. J. Kang, *J. Power Sources*, 2015, **280**, 39-46.
4. X. Li, J. Y. Zhang, R. Wang, H. Y. Huang, C. Xie, Z. H. Li, J. Li and C. M. Niu, *Nano Lett.*, 2015, **15**, 5268-5272.
5. H. Jiang, D. Y. Ren, H. F. Wang, Y. J. Hu, S. J. Guo, H. Y. Yuan, P. J. Hu, L. Zhang and C. Z. Li, *Adv. Mater.*, 2015, **27**, 3687-3695.
6. X. Y. Yu, H. Hu, Y. W. Wang, H. Y. Chen and X. Wen (David) Lou, *Chem. Int. Ed.*, 2015, **54**, 7395-7398.
7. J. H. Kong, C. Y. Zhao, Y. F. Wei and X. H. Lu, *ACS Appl. Mater. Interfaces*, 2015, **7**, 24279-24287.
8. C. Mao, Y. Zhong, H. J. Shang, C. S. Li, Z. Y. Guo and G. C. Li, *Chemical Engineering Journal*, 2016, **304**, 511-517.
9. Y. Fang, Y. Y. Lv, F. Gong, A. A. Elzatahry, G. F. Zheng and D. Y. Zhao, *Adv. Mater.*, 2016, **28**, 9385-9390.
10. Z. H. Miao, P. P. Wang, Y. C. Xiao, H. T. Fang, L. Zhen and C. Y. Xu, *ACS Appl. Mater.*

*Interfaces*, 2016, **8**, 33741-33748.

11. F. Y. Xiong, Z. Y. Cai, L. B. Qu, P. F. Zhang, Z. F. Yuan, O. K. Asare, W. W. Xu, C. Lin and L. Q. Mai, *ACS Appl. Mater. Interfaces*, 2015, **7**, 12625-12630.
12. C. B. Zhu, X. K. Mu, P. A. van Aken, Y. Yu and J. Maier, *Angew. Chem. Int. Ed.*, 2014, **53**, 2152-2156.
13. C. Wang, W. Wan, Y. H. Huang, J. T. Chen, H. H. Zhou and X. X. Zhang, *Nanoscale*, 2014, **6**, 5351-5358.
14. X. Y. Yu, H. Hu, Y. W. Wang, H. Y. Chen and X. W. (David) Lou, *Angew. Chem. Int. Ed.*, 2015, **54**, 7395-7398
